# Supplementary material for: Enhancing Paclitaxel Efficacy with Piperine-Paclitaxel Albumin Nanoparticles in Multidrug-Resistant Triple-Negative Breast Cancer by Inhibiting P-Glycoprotein
Source: MDPI journal article supplement (doi:10.3390/pharmaceutics15122703), 2023-11-30
Supplement: s1 [file s1]

## Supplementary:

# Enhancing Paclitaxel Efficacy with Piperine-Paclitaxel Albumin Nanoparticles in Multidrug-Resistant Triple-negative Breast Cancer by Inhibiting P-glycoprotein

Wenwen Xu<sup>1</sup>, Yumeng Xiao<sup>1</sup>, Liang Zheng<sup>2</sup>, Mingyu Xu<sup>1</sup>, Xuehua Jiang<sup>1</sup>, Ling Wang<sup>1, \*</sup>

<sup>1</sup> Key Laboratory of Drug-Targeting and Drug Delivery System of the Education Ministry, Department of Clinical Pharmacy and Pharmacy Administration, West China School of Pharmacy, Sichuan University, Chengdu, 610064, China

<sup>2</sup> Department of Clinical Pharmacology, The Second Affiliated Hospital of Anhui Medical University, Hefei, 230601, China

\* Correspondence: wlin\_scu@scu.edu.cn

**Table S1** The sequences of primers use for qPCR.

| Oligo name | Source | Sequence (5'-3')        |
|------------|--------|-------------------------|
| MDR1-F     | Human  | TGACTACCAGGCTCGCCAATGAT |
| MDR1-R     | Human  | TGTGCCACCAAGTAGGCTCCAAA |
| GAPDH-F    | Human  | AGAAGGCTGGGGCTCATTTG    |
| GAPDH-R    | Human  | AGGGGCCATCCACAGTCTTC    |
| Mdr1-F     | Mice   | GTGGGGGACAGAAACAGAGA    |
| Mdr1-R     | Mice   | GAACGGTAGACAAGCGATGAG   |
| Gapdh-F    | Mice   | CAAGGCTGTGGGCAAGGTCA    |
| Gapdh-R    | Mice   | AGGTGGAAGAGTGGGAGTTGCTG |

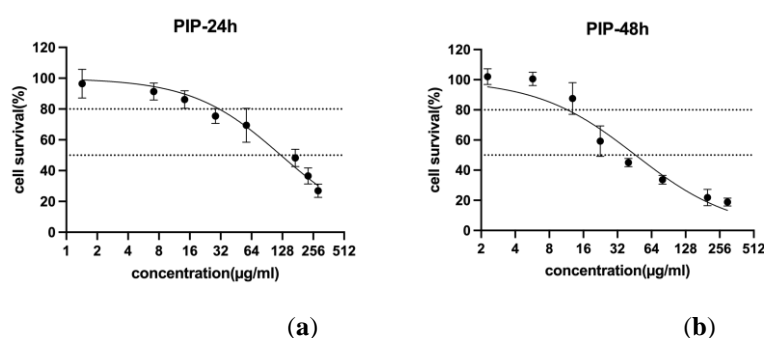

**Figure S1.** The cell survival of PIP treated with 4T1 cells for 24 h(a) and 48 h(b) respectively.

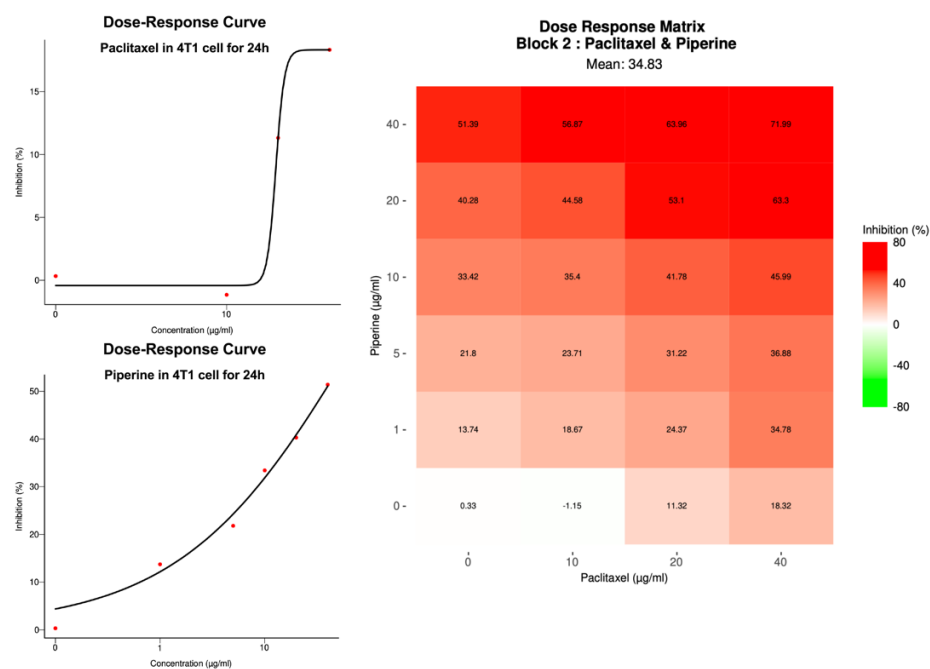

(a)

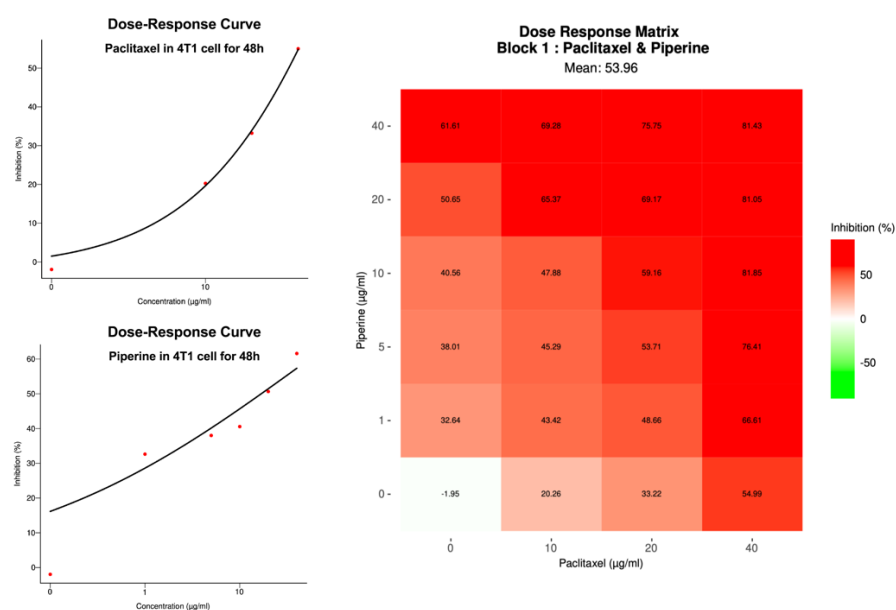

(b)

**Figure S2.** The dose-response curve of PTX and PIP, and the dose-response matrix between PTX and PIP was drawn by SynergyFinder+ (<https://synergyfinder.org>). (a) treatment on 4T1 cell for 24h. (b) treatment on 4T1 cell for 48h.

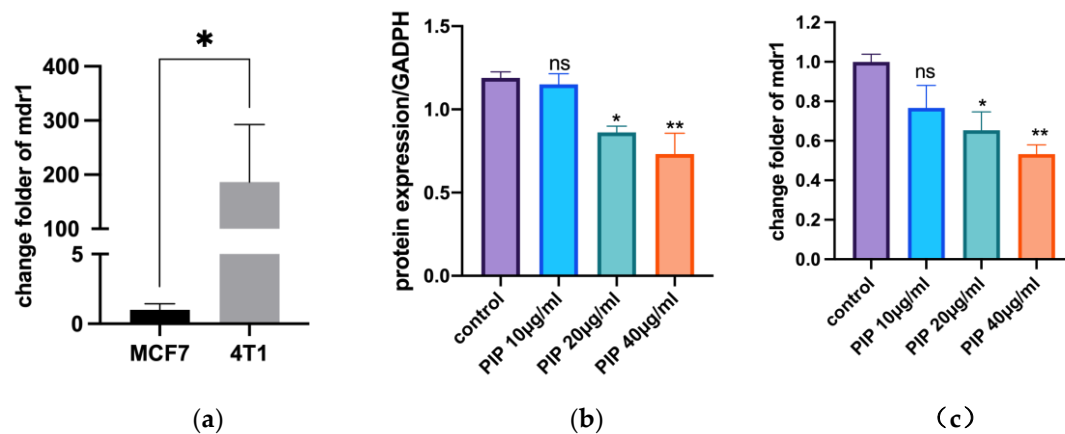

**Figure S3.** (a) The expression of mdr1 in MCF7 cell and 4T1 cells. (b): Quantified the P-gp expression caused by PIP through WB. (c): the effect of PIP on mdr1 gene regulation by qPCR. n=3, \* $<0.05$ , compare with control group.

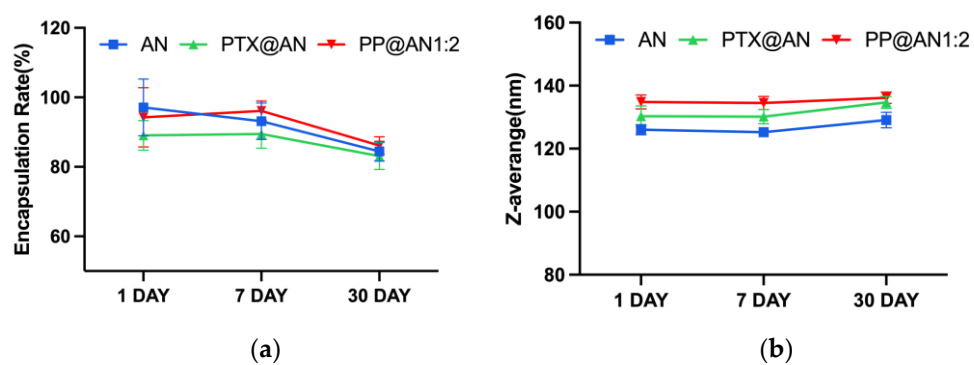

**Figure S4.** The Stability of encapsulation rate (a) and size (b).

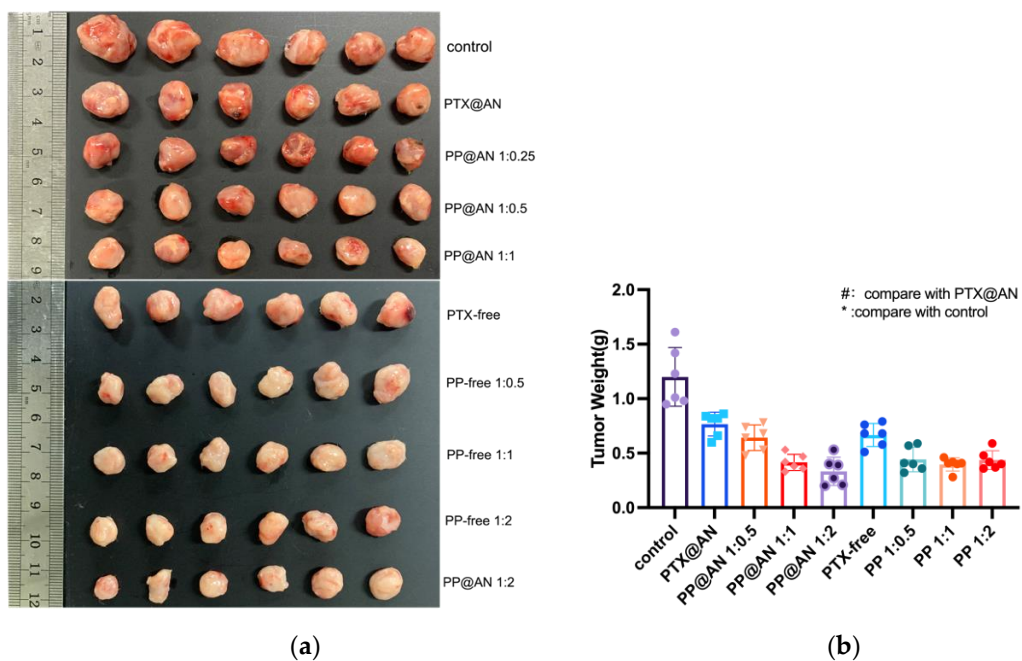

**Figure S5. (a)**The tumor tissue of mice after administration. **(b)** The tumor weight of each group after administration.

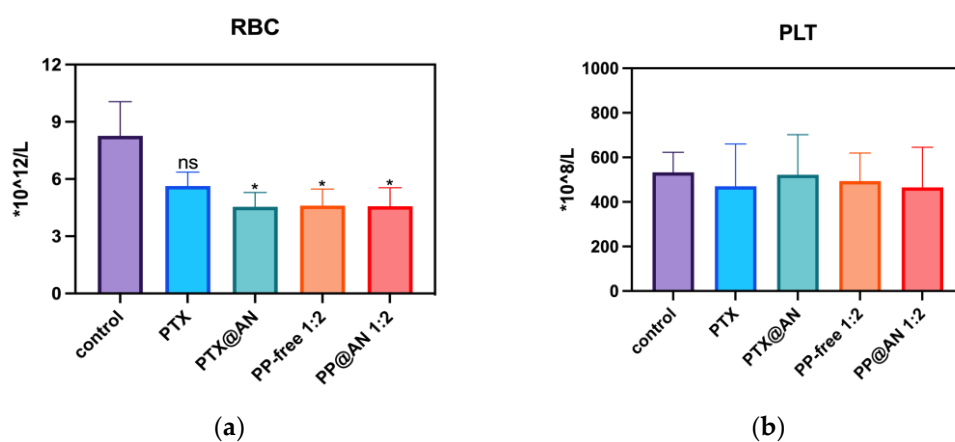

**Figure S6. The counts of Red Blood Cell (a) and Platelet (b).**

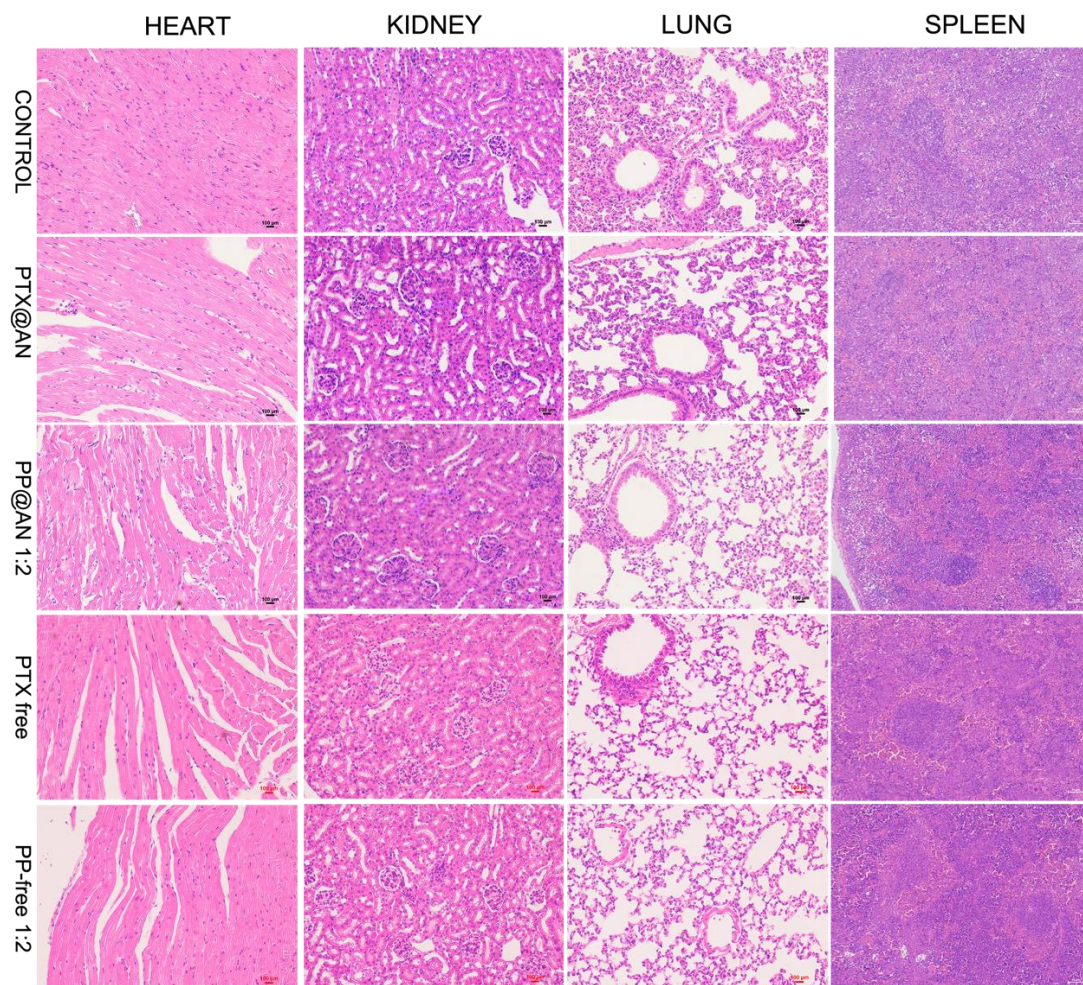

**Figure S7.** The HE stain of heart, kidney, lung and spleen.
